# Supplementary material for: Regulation of UGT1A1 and HNF1 transcription factor gene expression by DNA methylation in colon cancer cells
Source: Springer Nature journal article supplement (doi:10.1186/1471-2199-11-9), 2010-01-22
Supplement: 12867_2009_490_MOESM6_ESM.pdf [file 12867_2009_490_MOESM6_ESM.pdf]

**HT-29****HCT-116**

Untreated

5-Aza-dC

Untreated

5-Aza-dC

bp

650 –  
500 –  
400 –  
300 –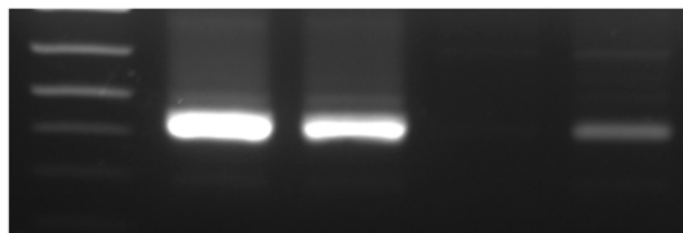**HNF1- $\alpha$** 500 –  
400 –  
300 –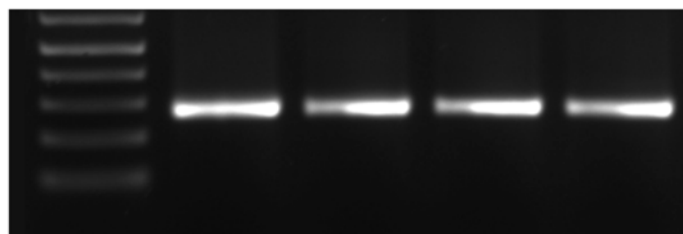**USF1**500 –  
400 –  
300 –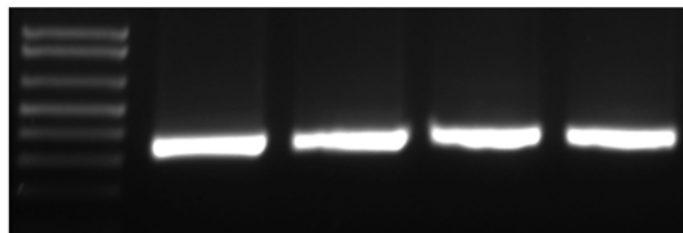**USF2**500 –  
400 –  
300 –  
200 –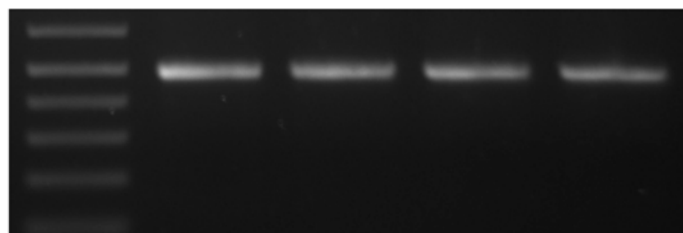**GADPH**
